# Supplementary material for: Grifola frondosa (Maitake) Extract Reduces Fat Accumulation and Improves Health Span in C. elegans through the DAF-16/FOXO and SKN-1/NRF2 Signalling Pathways
Source: MDPI journal article supplement (doi:10.3390/nu13113968), 2021-11-07
Supplement: s1 [file s1]

## Supplementary material

**Table S1.** Gene expression probes used for the quantitative real time PCR analysis.

| Gene             | Description                                                                                                    | Fw sequence                            | Rv sequence            | Probe sequence                                     |
|------------------|----------------------------------------------------------------------------------------------------------------|----------------------------------------|------------------------|----------------------------------------------------|
| <i>fat-7</i> *   | Delta(9)-fatty-acid desaturase fat-7                                                                           | ACAAGTTAAGGAGCATGGAGG                  | TCTCCTTCCAGAAATAAACGGG | /56-FAM/CAGAGAAAG/Zen/CACTATTTCCCACTGGTCA/3IABkFQ/ |
| <i>fat-5</i> *   | Delta(9)-fatty-acid desaturase fat-5                                                                           | CGTGTAGAAGGCGATGAAGG                   | GATTTGTACGAGGATCCGGTG  | /56FAM/ACGACTGGA/Zen/ATGAAGGTGGGCA/3IABkFQ/        |
| <i>acox-1</i> *  | Acyl-coenzyme A oxidase                                                                                        | AGCAAACCTGGAAAGCGTAGG                  | AACAAGATACTCGGCAGTGAG  | /56FAM/CGGGCGATG/Zen/AATGGGAAGAGACG/3IABkFQ/       |
| <i>maoc-1</i> *  | MAO-C-like dehydratase domain                                                                                  | CAGTAACCAATGTTTGTCTGG                  | TCATGGATTGTGCAGTCTGG   | /56FAM/CTGCTTGGG/Zen/CTGGAAATGATTCTGAC/3IABkFQ/    |
| Gene             | Description                                                                                                    | TaqMan Reference Gene Expression assay |                        |                                                    |
| <i>daf-16</i> ** | Fork-head domain-containing protein; Forkhead box protein O                                                    | Ce02422838_m1                          |                        |                                                    |
| <i>daf-2</i> **  | Insulin-like receptor subunit beta; Protein kinase domain-containing protein; Receptor protein-tyrosine kinase | Ce02444349_m1                          |                        |                                                    |
| <i>sod3</i> **   | Superoxide dismutase 3                                                                                         | Ce02404515_g1                          |                        |                                                    |
| <i>xbp1</i> **   | BZIP domain-containing protein                                                                                 | Ce02421281_g1                          |                        |                                                    |
| <i>hsp4</i> **   | Endoplasmic reticulum chaperone BiP homolog; Heat shock 70 kDa protein D                                       | Ce02434874_g1                          |                        |                                                    |
| <i>ire1</i> **   | Endoribonuclease; Serine/threonine-protein kinase                                                              | Ce02435651_g1                          |                        |                                                    |
| <i>skn-1</i> **  | BZIP domain-containing protein; Protein skinhead-1                                                             | Ce02407447_g1                          |                        |                                                    |
| <i>pmp-3</i> **  | Peroxisomal Membrane Protein related                                                                           | Ce02485188_m1                          |                        |                                                    |

\* PrimeTime qPCR Probe Assays (Integrated DNA Technologies, Inc).

\*\* TaqMan® Gene Expression Assays (Thermo Fisher Scientific).
